# Supplementary material
Source: PubMed Central journal article supplement (PMC4727155)
Supplement: supp_115.229740_jpet229740_suppl_fig_1.pdf [file supp_115.229740_jpet229740_suppl_fig_1.pdf]

JPET #229740

**Creation of ApoC-II Mutant Mice and Correction of their Hypertriglyceridemia with an  
ApoC-II Mimetic Peptide**

Toshihiro Sakurai, Akiko Sakurai, Boris L. Vaisman, Marcelo J. Amar, Chengyu Liu, Scott M.  
Gordon, Steven K. Drake, Milton Pryor, Maureen L. Sampson, Lita A. Freeman, Ling Yang, and  
Alan T. Remaley

*Journal of Pharmacology and Experimental Therapeutics*

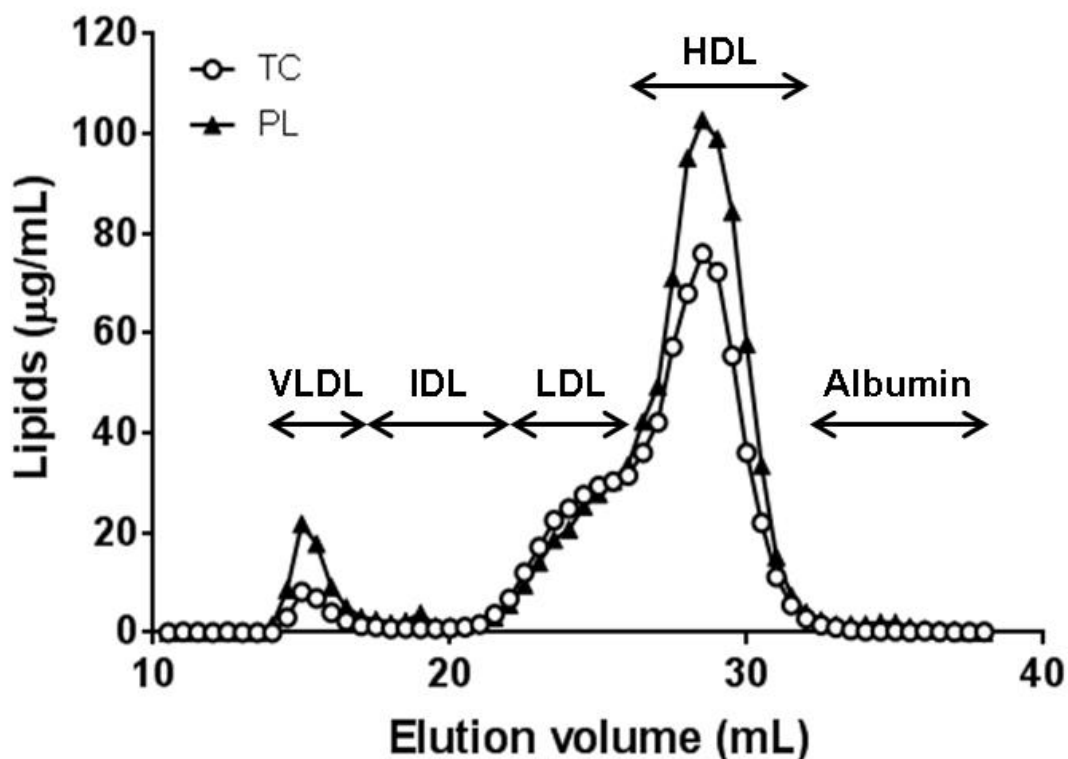

Supplemental Figure 1. Distribution of lipids in plasma separated by FPLC. 250  $\mu$ L of plasma obtained from a heterozygous mouse was separated by FPLC. The level of TC and PL in the fractions was measured by enzymatic assay. Fractions of VLDL/Chylos (Elution volume: 14.0-17.0 mL), IDL (17.5-22.0 mL), LDL (22.5-26.0 mL), HDL (26.5-32.0 mL) or Albumin (32.5-38.0 mL) were pooled and lipoproteins were isolated from pooled fractions using LRA. Each sample was used for immunoblotting to detect apoC-II protein (Fig. 2B).
